# Supplementary material for: The impact of the COVID-19 pandemic on perceived publication pressure among academic researchers in Canada
Source: PubMed Central journal article supplement (PMC9216619; doi:10.1371/journal.pone.0269743), 2022-06-22
Supplement: pone.0269743.s003.pdf [file pone.0269743.s003.pdf]

**Supporting Table 1. Trainee respondent goal career field following completion of studies. N= 777.**

| <b>Career Field</b>                                                 | <b>N (%)</b>      |
|---------------------------------------------------------------------|-------------------|
| Academia                                                            | 400 (51%)         |
| Non-academic field (Research publication history is valued)         | 312 (40%)         |
| Non-academic field (Research publication history is not considered) | 65 (8%)           |
| <b>Total</b>                                                        | <b>777 (100%)</b> |
