# Supplementary material for: The impact of the COVID-19 pandemic on perceived publication pressure among academic researchers in Canada
Source: PubMed Central journal article supplement (PMC9216619; doi:10.1371/journal.pone.0269743), 2022-06-22
Supplement: pone.0269743.s004.pdf [file pone.0269743.s004.pdf]

**Supporting Table 2. Location of respondents' affiliated research institution. N=1020**

| <b>Career Field</b>       | <b>N (%)</b>       |
|---------------------------|--------------------|
| Alberta                   | 77 (8%)            |
| British Columbia          | 168 (16%)          |
| Manitoba                  | 69 (7%)            |
| New Brunswick             | 42 (4%)            |
| Newfoundland and Labrador | 40 (4%)            |
| Northwest Territories     | 30 (3%)            |
| Nova Scotia               | 47 (5%)            |
| Nunavut                   | 19 (2%)            |
| Ontario                   | 434 (43%)          |
| Prince Edward Island      | 11 (1%)            |
| Quebec                    | 57 (6%)            |
| Saskatchewan              | 14 (1%)            |
| Yukon                     | 5 (0.5%)           |
| Prefer not to Answer      | 7 (1%)             |
| <b>Total</b>              | <b>1020 (100%)</b> |
