# Supplementary material for: The impact of the COVID-19 pandemic on perceived publication pressure among academic researchers in Canada
Source: PubMed Central journal article supplement (PMC9216619; doi:10.1371/journal.pone.0269743), 2022-06-22
Supplement: pone.0269743.s005.pdf [file pone.0269743.s005.pdf]

**Supporting Table 3. Respondent ethnicity.** Respondents could select multiple responses. N=1020. These categories were adapted from the Statistics Canada Visible Minority and Population Group Reference Guide, Census of Population (2016) [66]. Examples of respondent descriptions who chose to self-identify include: Biracial or mixed race, Canadian, Jewish, and West Indian.

| <b>Race</b>             | <b>N (%)</b>       |
|-------------------------|--------------------|
| Arab                    | 29 (3%)            |
| Black                   | 59 (6%)            |
| Chinese                 | 57 (6%)            |
| Filipino/a              | 11 (1%)            |
| Indigenous              | 25 (2%)            |
| Japanese                | 6 (1%)             |
| Korean                  | 10 (1%)            |
| Latin American          | 29 (3%)            |
| South Asian             | 49 (5%)            |
| South East Asian        | 9 (1%)             |
| West Asian              | 17 (2%)            |
| White                   | 737 (72%)          |
| Prefer to Self-Identify | 20 (2%)            |
| Prefer not to Answer    | 28 (23%)           |
| <b>Total</b>            | <b>1020 (100%)</b> |
