# Supplementary material for: The impact of the COVID-19 pandemic on perceived publication pressure among academic researchers in Canada
Source: PubMed Central journal article supplement (PMC9216619; doi:10.1371/journal.pone.0269743), 2022-06-22
Supplement: pone.0269743.s006.pdf [file pone.0269743.s006.pdf]

**Supporting Table 4. Publication Pressure Questionnaire Subscale Scores stratified by academic position.** Values represent mean score with standard deviation in brackets.

| Academic Position                       | N    | Stress         |                | Attitude       |                | Resources      |                |
|-----------------------------------------|------|----------------|----------------|----------------|----------------|----------------|----------------|
|                                         |      | Pre-<br>COVID  | Post-<br>COVID | Pre-<br>COVID  | Post-<br>COVID | Pre-<br>COVID  | Post-<br>COVID |
| Graduate Student:<br>Master's Degree    | 166  | 3.04<br>(0.72) | 3.28<br>(0.70) | 3.15<br>(0.64) | 3.19<br>(0.71) | 2.73<br>(0.53) | 2.83<br>(0.58) |
| Graduate Student:<br>Doctoral Degree    | 410  | 3.29<br>(0.71) | 3.47<br>(1.02) | 3.38<br>(0.66) | 3.46<br>(0.70) | 2.69<br>(0.62) | 2.86<br>(0.66) |
| Postdoctoral Fellow                     | 201  | 3.09<br>(0.62) | 3.25<br>(0.71) | 3.23<br>(0.63) | 3.29<br>(0.73) | 2.79<br>(0.58) | 2.83<br>(0.53) |
| Principal Investigator:<br>Early Career | 121  | 3.24<br>(0.69) | 3.39<br>(0.77) | 3.27<br>(0.59) | 3.34<br>(0.66) | 2.59<br>(0.52) | 2.70<br>(0.52) |
| Principal Investigator:<br>Mid-Career   | 66   | 3.21<br>(0.88) | 3.40<br>(1.08) | 3.52<br>(0.70) | 3.56<br>(0.73) | 2.27<br>(0.64) | 2.48<br>(0.69) |
| Principal Investigator:<br>Senior       | 56   | 3.27<br>(0.93) | 3.42<br>(1.07) | 3.29<br>(0.82) | 3.31<br>(0.85) | 2.24<br>(0.73) | 2.33<br>(0.76) |
| <b>Total Population</b>                 | 1020 | 3.20<br>(0.72) | 3.38<br>(0.82) | 3.31<br>(0.66) | 3.37<br>(0.72) | 2.65<br>(0.62) | 2.78<br>(0.63) |
