# Supplementary material for: The impact of the COVID-19 pandemic on perceived publication pressure among academic researchers in Canada
Source: PubMed Central journal article supplement (PMC9216619; doi:10.1371/journal.pone.0269743), 2022-06-22
Supplement: pone.0269743.s007.pdf [file pone.0269743.s007.pdf]

**Supporting Table 5. Publication Pressure Questionnaire Subscale Scores stratified by trainee goal career field after studies.** Values represent mean score with standard deviation in brackets.

| Career Field                                                                 | N    | Stress         |                | Attitude       |                | Resources      |                |
|------------------------------------------------------------------------------|------|----------------|----------------|----------------|----------------|----------------|----------------|
|                                                                              |      | Pre-COVID      | Post-COVID     | Pre-COVID      | Post-COVID     | Pre-COVID      | Post-COVID     |
| Academia                                                                     | 400  | 3.28<br>(0.76) | 3.51<br>(0.84) | 3.36<br>(0.68) | 3.44<br>(0.76) | 2.65<br>(0.63) | 2.79<br>(0.68) |
| Non-academic field<br>(Research publication<br>history is valued)            | 312  | 3.05<br>(0.60) | 3.20<br>(0.67) | 3.21<br>(0.61) | 3.24<br>(0.65) | 2.78<br>(0.65) | 2.82<br>(0.54) |
| Non-academic field<br>(Research publication<br>history is not<br>considered) | 65   | 3.24<br>(0.66) | 3.37<br>(0.62) | 3.33<br>(0.72) | 3.39<br>(0.70) | 2.95<br>(0.58) | 3.09<br>(0.51) |
| <b>Total Population</b>                                                      | 1020 | 3.20<br>(0.72) | 3.38<br>(0.82) | 3.31<br>(0.66) | 3.37<br>(0.72) | 2.65<br>(0.62) | 2.78<br>(0.63) |
