# Supplementary material for: The impact of the COVID-19 pandemic on perceived publication pressure among academic researchers in Canada
Source: PubMed Central journal article supplement (PMC9216619; doi:10.1371/journal.pone.0269743), 2022-06-22
Supplement: pone.0269743.s008.pdf [file pone.0269743.s008.pdf]

**Supporting Table 6. Publication Pressure Questionnaire Subscale Scores stratified by research funding agency.** Values represent mean score with standard deviation in brackets.

| Funding Agency          | N    | Stress         |                | Attitude       |                | Resources      |                |
|-------------------------|------|----------------|----------------|----------------|----------------|----------------|----------------|
|                         |      | Pre-<br>COVID  | Post-<br>COVID | Pre-<br>COVID  | Post-<br>COVID | Pre-<br>COVID  | Post-<br>COVID |
| CIHR                    | 321  | 3.20<br>(0.68) | 3.38<br>(0.79) | 3.31<br>(0.65) | 3.34<br>(0.73) | 2.66<br>(0.61) | 2.81<br>(0.66) |
| NSERC                   | 306  | 3.16<br>(0.73) | 3.36<br>(0.80) | 3.33<br>(0.66) | 3.41<br>(0.70) | 2.65<br>(0.62) | 2.76<br>(0.61) |
| SSHRC                   | 393  | 3.22<br>(0.75) | 3.39<br>(0.85) | 3.28<br>(0.68) | 3.35<br>(0.73) | 2.66<br>(0.62) | 2.76<br>(0.62) |
| <b>Total Population</b> | 1020 | 3.20<br>(0.72) | 3.38<br>(0.82) | 3.31<br>(0.66) | 3.37<br>(0.72) | 2.65<br>(0.62) | 2.78<br>(0.63) |

Values represent mean score with standard deviation in brackets. CIHR: Canadian Institutes of Health Research, NSERC: Natural Sciences and Engineering Research Council, SSHRC: Social Sciences and Humanities Research Council.
