# Supplementary material for: The impact of the COVID-19 pandemic on perceived publication pressure among academic researchers in Canada
Source: PubMed Central journal article supplement (PMC9216619; doi:10.1371/journal.pone.0269743), 2022-06-22
Supplement: pone.0269743.s009.pdf [file pone.0269743.s009.pdf]

**Supporting Table 7. Publication Pressure Questionnaire Subscale Scores stratified by location.** Values represent mean score with standard deviation in brackets.

| Location                     | N   | Stress         |                | Attitude       |                | Resources      |                |
|------------------------------|-----|----------------|----------------|----------------|----------------|----------------|----------------|
|                              |     | Pre-<br>COVID  | Post-<br>COVID | Pre-<br>COVID  | Post-<br>COVID | Pre-<br>COVID  | Post-<br>COVID |
| Alberta                      | 77  | 3.05<br>(0.68) | 3.16<br>(0.83) | 3.12<br>(0.62) | 3.15<br>(0.73) | 2.77<br>(0.57) | 2.85<br>(0.67) |
| British Columbia             | 168 | 3.08<br>(0.58) | 3.29<br>(0.68) | 3.22<br>(0.63) | 3.31<br>(0.69) | 2.71<br>(0.58) | 2.80<br>(0.57) |
| Manitoba                     | 69  | 3.07<br>(0.55) | 3.15<br>(0.58) | 3.19<br>(0.51) | 3.14<br>(0.60) | 2.86<br>(0.46) | 2.96<br>(0.49) |
| New Brunswick                | 42  | 2.92<br>(0.54) | 3.10<br>(0.52) | 3.19<br>(0.55) | 3.15<br>(0.41) | 2.86<br>(0.48) | 2.88<br>(0.40) |
| Newfoundland and<br>Labrador | 40  | 3.13<br>(0.64) | 3.19<br>(0.65) | 3.17<br>(0.71) | 3.20<br>(0.67) | 2.71<br>(0.54) | 2.80<br>(0.57) |
| Northwest Territories        | 30  | 3.08<br>(0.39) | 2.91<br>(0.51) | 3.09<br>(0.37) | 3.08<br>(0.35) | 2.88<br>(0.39) | 2.95<br>(0.35) |
| Nova Scotia                  | 47  | 3.06<br>(0.69) | 3.08<br>(0.82) | 3.15<br>(0.61) | 3.17<br>(0.65) | 2.78<br>(0.58) | 2.81<br>(0.51) |
| Nunavut                      | 19  | 2.91<br>(0.30) | 2.89<br>(0.19) | 3.06<br>(0.41) | 2.96<br>(0.49) | 3.02<br>(0.35) | 3.07<br>(0.33) |

|                         |      |                |                |                |                |                |                |
|-------------------------|------|----------------|----------------|----------------|----------------|----------------|----------------|
| Ontario                 | 434  | 3.35<br>(0.81) | 3.60<br>(0.88) | 3.46<br>(0.70) | 3.55<br>(0.74) | 2.51<br>(0.66) | 2.70<br>(0.70) |
| Prince Edward Island    | 11   | 2.76<br>(0.42) | 3.03<br>(0.35) | 2.89<br>(0.55) | 3.07<br>(0.59) | 3.12<br>(0.45) | 3.00<br>(0.37) |
| Quebec                  | 57   | 3.27<br>(0.73) | 3.53<br>(0.91) | 3.42<br>(0.70) | 3.48<br>(0.88) | 2.53<br>(0.60) | 2.68<br>(0.73) |
| Saskatchewan            | 14   | 3.42<br>(0.89) | 3.54<br>(0.82) | 3.37<br>(0.86) | 3.50<br>(0.87) | 2.40<br>(0.78) | 2.50<br>(0.56) |
| Yukon                   | 5    | 2.80<br>(0.14) | 2.70<br>(0.46) | 3.13<br>(0.32) | 3.03<br>(0.36) | 3.20<br>(0.32) | 3.00<br>(0.26) |
| Prefer not to Answer    | 7    | 3.69<br>(1.22) | 3.95<br>(1.26) | 3.04<br>(0.92) | 2.98<br>(1.11) | 2.61<br>(0.65) | 2.88<br>(0.74) |
| <b>Total Population</b> | 1020 | 3.20<br>(0.72) | 3.38<br>(0.82) | 3.31<br>(0.66) | 3.37<br>(0.72) | 2.65<br>(0.62) | 2.78<br>(0.63) |

Respondents from Ontario had significantly higher pre-COVID Stress scores ( $M=3.35$ ) than British Columbia ( $M=3.08$ ,  $p=0.0025$ , one-way ANOVA). Post-COVID Ontario respondents had significantly higher Stress scores ( $M=3.60$ ) than Alberta ( $M=3.16$ ,  $p=0.0004$ , one-way ANOVA), British Columbia ( $M=3.29$ ,  $p=0.0016$ , one-way ANOVA), and Manitoba ( $M=3.15$ ,  $p=0.0011$ , one-way ANOVA).

Respondents from Ontario had significantly higher pre-COVID Attitude scores ( $M=3.46$ ) than Alberta ( $M=3.12$ ,  $p=0.003$ , one-way ANOVA) and British Columbia ( $M=3.22$ ,  $p=0.0054$ , one-way ANOVA). Following the COVID-19 pandemic, Ontario respondents had significantly higher

Attitude scores ( $M=3.55$ ) than Alberta ( $M=3.15$ ,  $p=0.0004$ , one-way ANOVA), British Columbia ( $M=3.31$ ,  $p=0.017$ , one-way ANOVA), and Manitoba ( $M=3.14$ ,  $p=0.0007$ , one-way ANOVA).

Respondents from Ontario had significantly lower pre-COVID Resources scores ( $M=3.46$ ) than Alberta ( $M=2.77$ ,  $p=0.04$ , one-way ANOVA), British Columbia ( $M=2.71$ ,  $p=0.019$ , one-way ANOVA), and Manitoba ( $M=2.86$ ,  $p=0.00066$ , one-way ANOVA). There were no significant differences in post-COVID Resources scores between respondent locations.

Prior to the onset of the COVID-19 pandemic, location had small effects on Stress scores (partial eta squared=0.050) and Attitude scores (partial eta squared=0.051), while having a moderate effect on Resources scores (partial eta squared=0.066). After the onset of the pandemic, location had a moderate effect on Stress scores (partial eta squared=0.084) and Attitude scores (partial eta squared=0.067).
