# Supplementary material for: The impact of the COVID-19 pandemic on perceived publication pressure among academic researchers in Canada
Source: PubMed Central journal article supplement (PMC9216619; doi:10.1371/journal.pone.0269743), 2022-06-22
Supplement: pone.0269743.s010.pdf [file pone.0269743.s010.pdf]

**Supporting Table 8. Publication Pressure Questionnaire Subscale Scores stratified by ethnicity.** Values represent mean score with standard deviation in brackets.

| Location                | N    | Stress         |                | Attitude       |                | Resources      |                |
|-------------------------|------|----------------|----------------|----------------|----------------|----------------|----------------|
|                         |      | Pre-COVID      | Post-COVID     | Pre-COVID      | Post-COVID     | Pre-COVID      | Post-COVID     |
| Arab                    | 29   | 2.89<br>(0.71) | 3.23<br>(0.79) | 3.29<br>(0.78) | 3.47<br>(0.67) | 2.57<br>(0.64) | 2.74<br>(0.59) |
| Black                   | 59   | 2.93<br>(0.44) | 3.15<br>(0.66) | 3.21<br>(0.65) | 3.26<br>(0.74) | 2.76<br>(0.61) | 2.75<br>(0.54) |
| Chinese                 | 57   | 3.07<br>(0.63) | 3.28<br>(0.66) | 3.26<br>(0.69) | 3.34<br>(0.70) | 2.63<br>(0.64) | 2.80<br>(0.58) |
| Filipino/a              | 11   | 3.11<br>(0.62) | 3.18<br>(0.74) | 2.80<br>(0.44) | 3.06<br>(0.64) | 2.89<br>(0.55) | 3.05<br>(0.35) |
| Indigenous              | 25   | 3.05<br>(0.55) | 3.08<br>(0.61) | 3.18<br>(0.61) | 3.15<br>(0.75) | 2.68<br>(0.58) | 2.77<br>(0.65) |
| Japanese                | 6    | 3.03<br>(0.37) | 3.11<br>(0.99) | 3.25<br>(0.55) | 3.25<br>(0.58) | 3.11<br>(0.31) | 3.14<br>(0.46) |
| Korean                  | 10   | 3.12<br>(0.77) | 3.17<br>(0.89) | 3.23<br>(0.56) | 3.33<br>(0.65) | 2.67<br>(0.45) | 2.63<br>(0.44) |
| Latin American          | 29   | 3.32<br>(0.82) | 3.59<br>(0.85) | 3.53<br>(0.74) | 3.49<br>(0.82) | 2.60<br>(0.70) | 2.72<br>(0.70) |
| South Asian             | 49   | 3.36<br>(0.67) | 3.55<br>(0.87) | 3.35<br>(0.69) | 3.59<br>(0.72) | 2.57<br>(0.54) | 2.78<br>(0.70) |
| South East Asian        | 9    | 3.02<br>(0.47) | 3.19<br>(0.72) | 3.22<br>(0.67) | 3.17<br>(0.54) | 2.69<br>(0.61) | 2.69<br>(0.63) |
| West Asian              | 17   | 3.09<br>(0.64) | 3.29<br>(0.71) | 3.36<br>(0.40) | 3.39<br>(0.52) | 2.76<br>(0.49) | 2.89<br>(0.37) |
| White                   | 737  | 3.21<br>(0.72) | 3.38<br>(0.81) | 3.32<br>(0.65) | 3.36<br>(0.71) | 2.64<br>(0.61) | 2.77<br>(0.64) |
| Prefer to Self-Identify | 20   | 3.29<br>(1.13) | 3.53<br>(1.21) | 3.55<br>(0.68) | 3.72<br>(0.63) | 2.63<br>(0.83) | 2.59<br>(0.79) |
| Prefer not to Answer    | 28   | 3.73<br>(0.78) | 3.96<br>(0.91) | 3.51<br>(0.72) | 3.53<br>(0.80) | 2.62<br>(0.69) | 2.88<br>(0.62) |
| <b>Total Population</b> | 1020 | 3.20<br>(0.72) | 3.38<br>(0.82) | 3.31<br>(0.66) | 3.37<br>(0.72) | 2.65<br>(0.62) | 2.78<br>(0.63) |
